# Supplementary material for: Liver-expressed antimicrobial peptide 2 antagonizes the effect of ghrelin in rodents
Source: PubMed Central journal article supplement (PMC6839046; doi:10.1530/joe-19-0102), 2019-09-19
Supplement: supplementary_figure_1.pdf [file supplementary_figure_1.pdf]

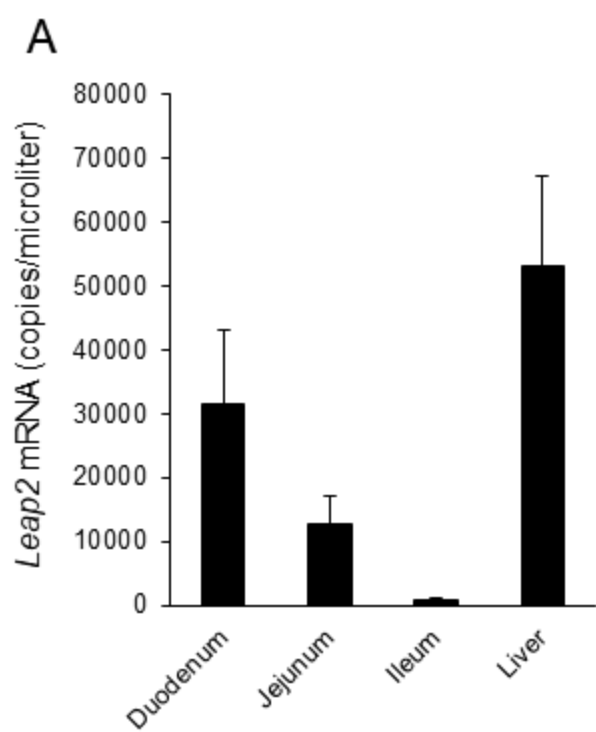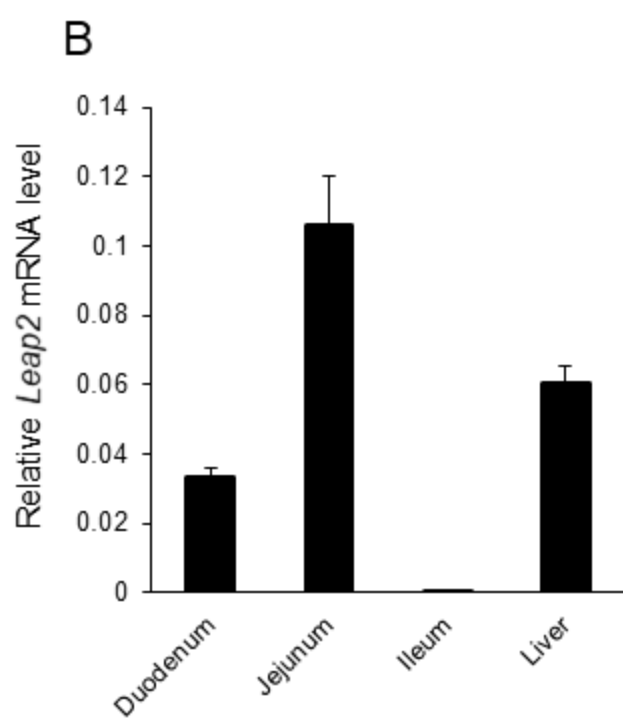

Supplementary Fig. 1
