# Supplementary material for: Liver-expressed antimicrobial peptide 2 antagonizes the effect of ghrelin in rodents
Source: PubMed Central journal article supplement (PMC6839046; doi:10.1530/joe-19-0102), 2019-09-19

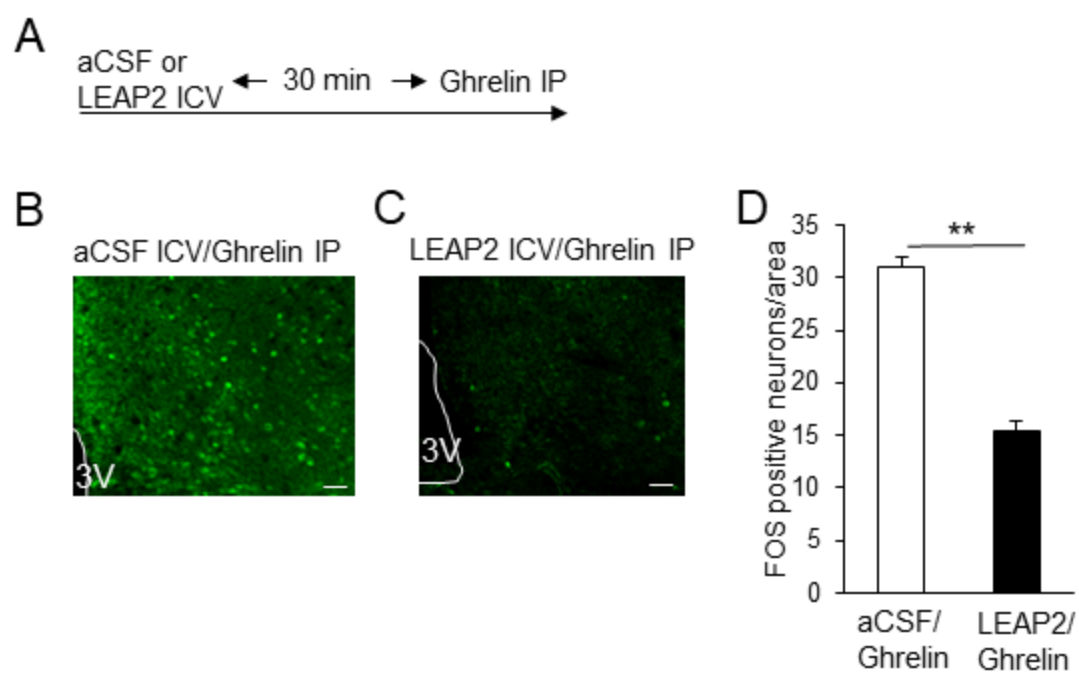

Supplement: supplementary_figure_2.pdf [file supplementary_figure_2.pdf]
