# Supplementary material for: Liver-expressed antimicrobial peptide 2 antagonizes the effect of ghrelin in rodents
Source: PubMed Central journal article supplement (PMC6839046; doi:10.1530/joe-19-0102), 2019-09-19
Supplement: supplementary_table_1.pdf [file supplementary_table_1.pdf]

|                          |                   | Rat-1      | Rat-2      |
|--------------------------|-------------------|------------|------------|
| Added LEAP2 peptide (ng) | Plasma ( $\mu$ l) | LEAP2 (ng) | LEAP2 (ng) |
| 0                        | 80                | 17.1       | 21.9       |
| 0                        | 40                | 9.5        | 11.6       |
| 0                        | 20                | 4.8        | 6.1        |
| 7.5                      | 20                | 12.2       | 13.9       |

Supplemental Table. 1
